# Supplementary material
Source: PubMed Central journal article supplement (PMC6554067)
Supplement: NIHMS1516111-supplement-1.pdf [file NIHMS1516111-supplement-1.pdf]

Supplemental Figure 1. Participant flow chart, The Third National and Nutrition Examination Survey (NHANES III)

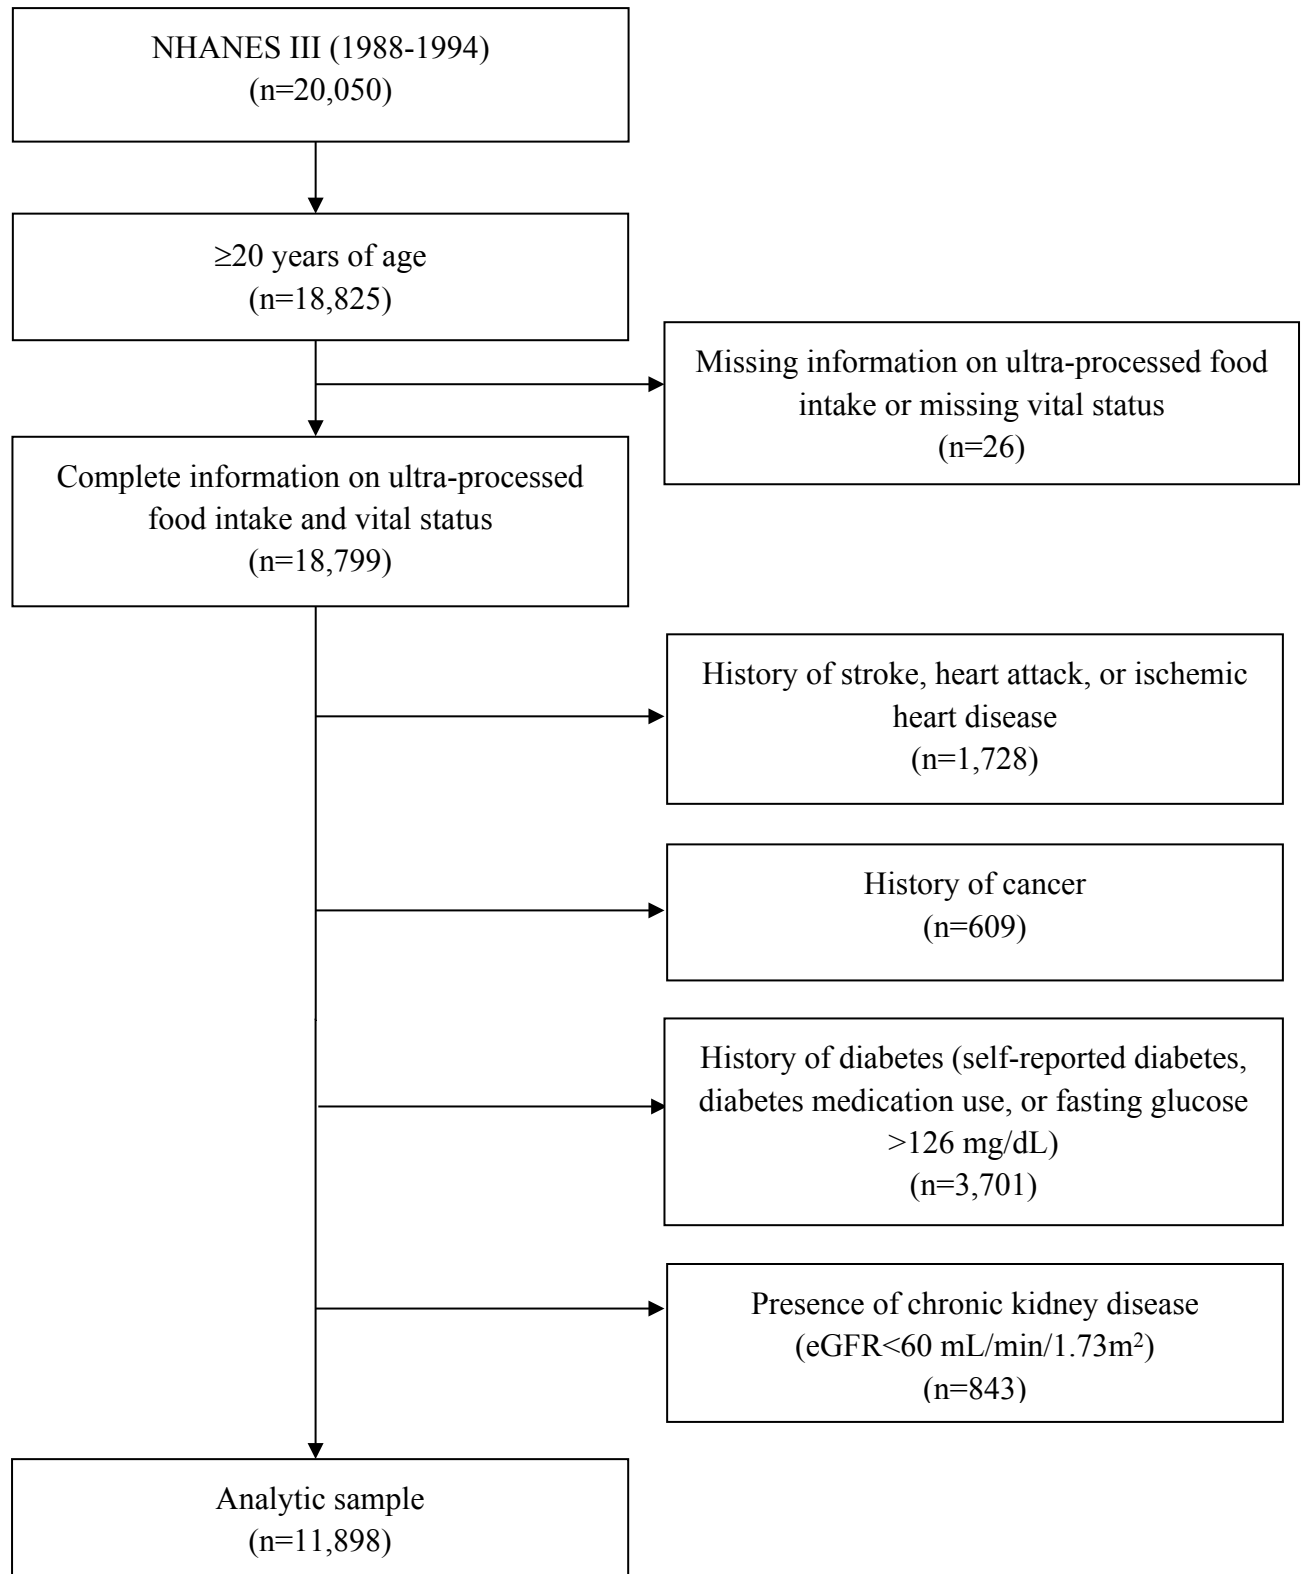

## Supplementary data

Supplemental Table 1. Classification of food items on food frequency questionnaire representing levels of processing

| NOVA Food Category             | Food Items                                                                                                                                                                                                                                                                                                                                                                                 |
|--------------------------------|--------------------------------------------------------------------------------------------------------------------------------------------------------------------------------------------------------------------------------------------------------------------------------------------------------------------------------------------------------------------------------------------|
| Minimally processed foods      | Milk (whole, 2%, 1%, skim), yogurt, beef, shrimp, clams, fish, chicken and turkey, liver and other organ meats, eggs, fruits, vegetables, lentils, dried beans, chickpeas, peanuts, peanut butter, rice, coffee, tea                                                                                                                                                                       |
| Processed culinary ingredients | Butter, oil, vinegar                                                                                                                                                                                                                                                                                                                                                                       |
| Processed foods                | Cheese (all types), pork and ham, stew or soup with vegetables, breads (white, dark, and corn) and rolls, flour tortillas, tofu and other soy products, beer, wine                                                                                                                                                                                                                         |
| Ultra-processed foods          | Chocolate milk, ice cream, ice milk, milkshakes, bacon, sausage, processed meats, sweetened cereals, spaghetti/pasta with tomato sauce, cheese dishes, pizza, calzone, lasagna, salted snacks, cakes, cookies, brownies, fruit juices, sugar-sweetened and artificially sweetened beverages (Hi-C, Tang, Koolaid, diet colas, diet sodas, regular colas and sodas), hard liquor, margarine |
